# Supplementary material for: SF-1 Induces Nuclear PIP2
Source: MDPI journal article supplement (doi:10.3390/biom13101509), 2023-10-12

# **Supplemental Materials.**

## **SF-1 induces nuclear PIP2.**

Ethan S. Chi<sup>1</sup>, Elizabeth A. Stivison<sup>1</sup> and Raymond D. Blind<sup>1,2</sup>

<sup>1</sup>Department of Medicine, Division of Diabetes, Endocrinology and Metabolism, Vanderbilt University Medical Center, Nashville, TN 37232

<sup>2</sup>To whom correspondence should be addressed: [ray.blind@vanderbilt.edu](mailto:ray.blind@vanderbilt.edu)

Supplemental Figure S1, Chi, et al.

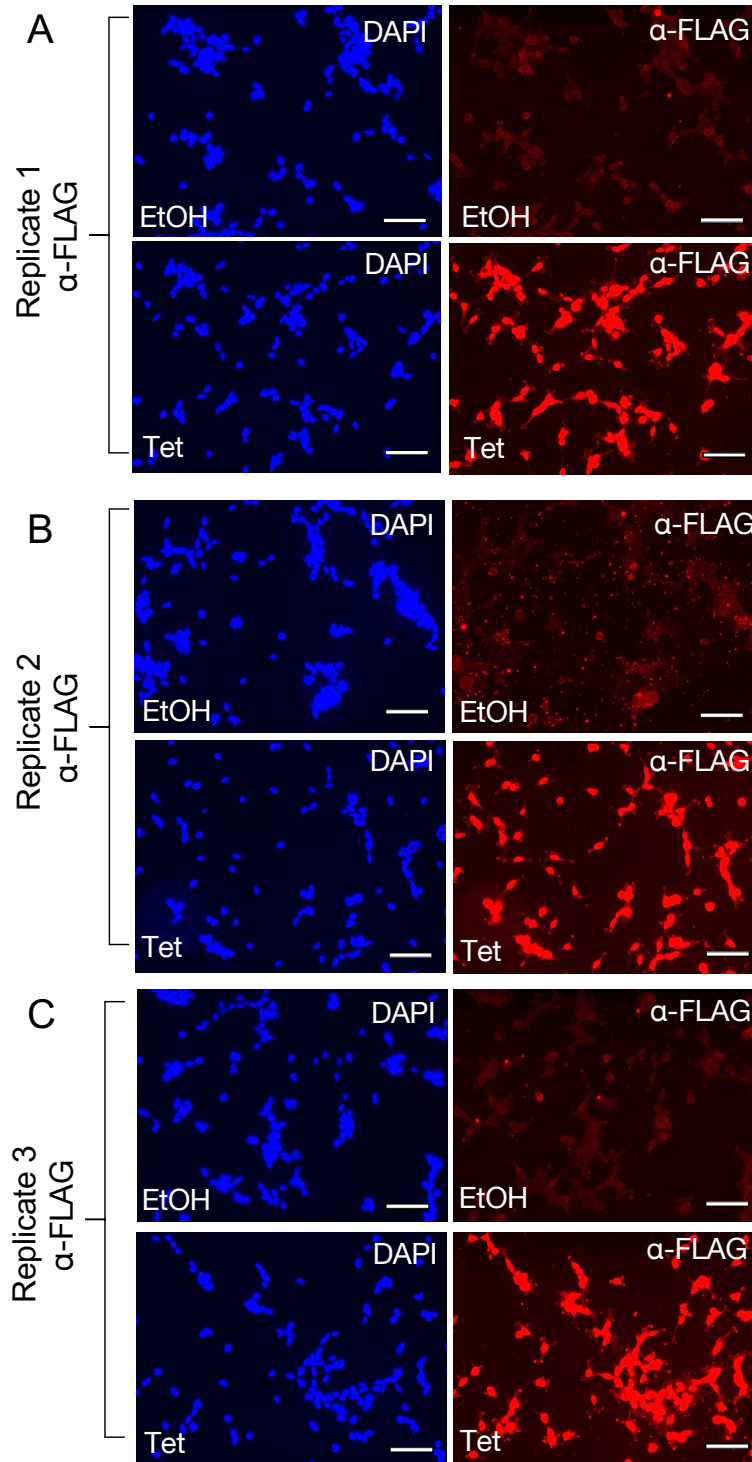

**Supplemental Figure S1.** Triplicate, independent chambers of wild-type SF-1 HEK cells stained with anti-FLAG antibodies. HEK cells bearing a stable, tetracycline (Tet) inducible wild type SF-1 were stained for **A.** Replicate 1 **B.** Replicate 2 or **C.** Replicate 3 with DAPI (left) and  $\alpha$ -FLAG antibodies and IF images collected. Scale bar represents 125 $\mu$ m, images were collected at 40X with identical settings, all images had brightness increased by 50%. These data confirm SF-1 is expressed in the nucleus of these cells, as observed in previous publications.

Supplemental Figure S2, Chi, et al.

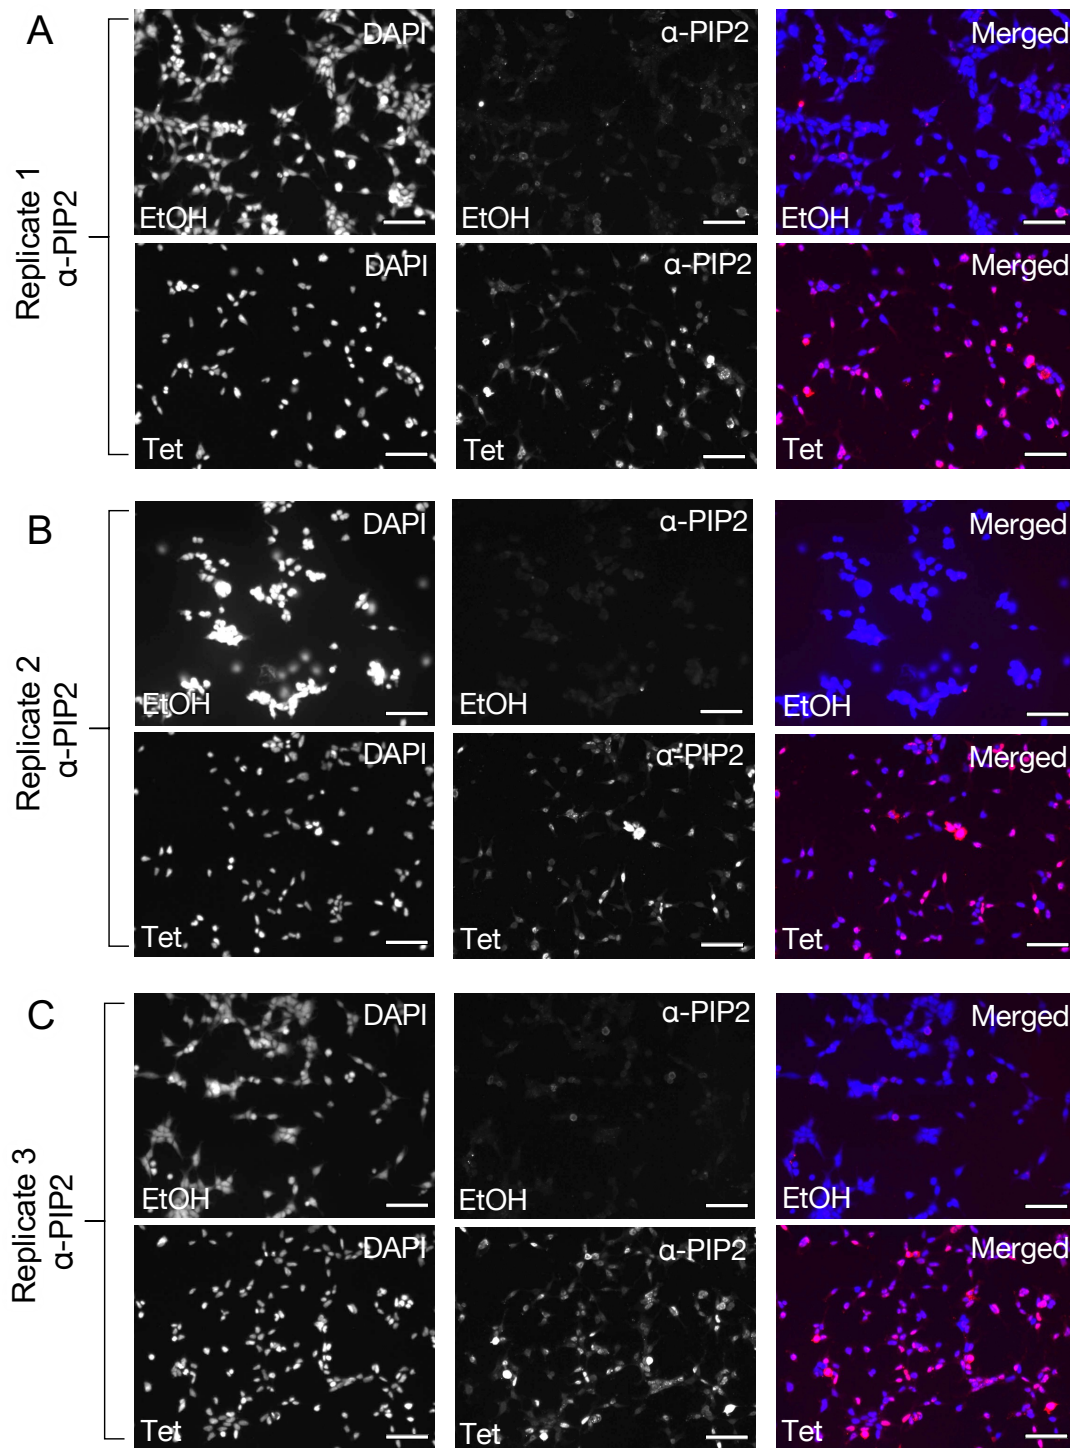

**Supplemental Figure S2.** Triplicates of independent chambers of wild-type SF-1 HEK cells stained with *PI(4,5)P2* antibodies. HEK cells bearing a stable, tetracycline (tet) inducible wild type SF-1 were stained for **A.** Replicate 1 **B.** Replicate 2 or **C.** Replicate 3 with DAPI (left) and α-PIP2 (middle) and IF images collected. Scale bar represents 125um, images were collected at 40X with identical settings. All images had brightness increased by 50%, DAPI (blue) and anti-PIP2 (red) image color was desaturated in the non-merged images.

Supplemental Figure S3, Chi, et al.

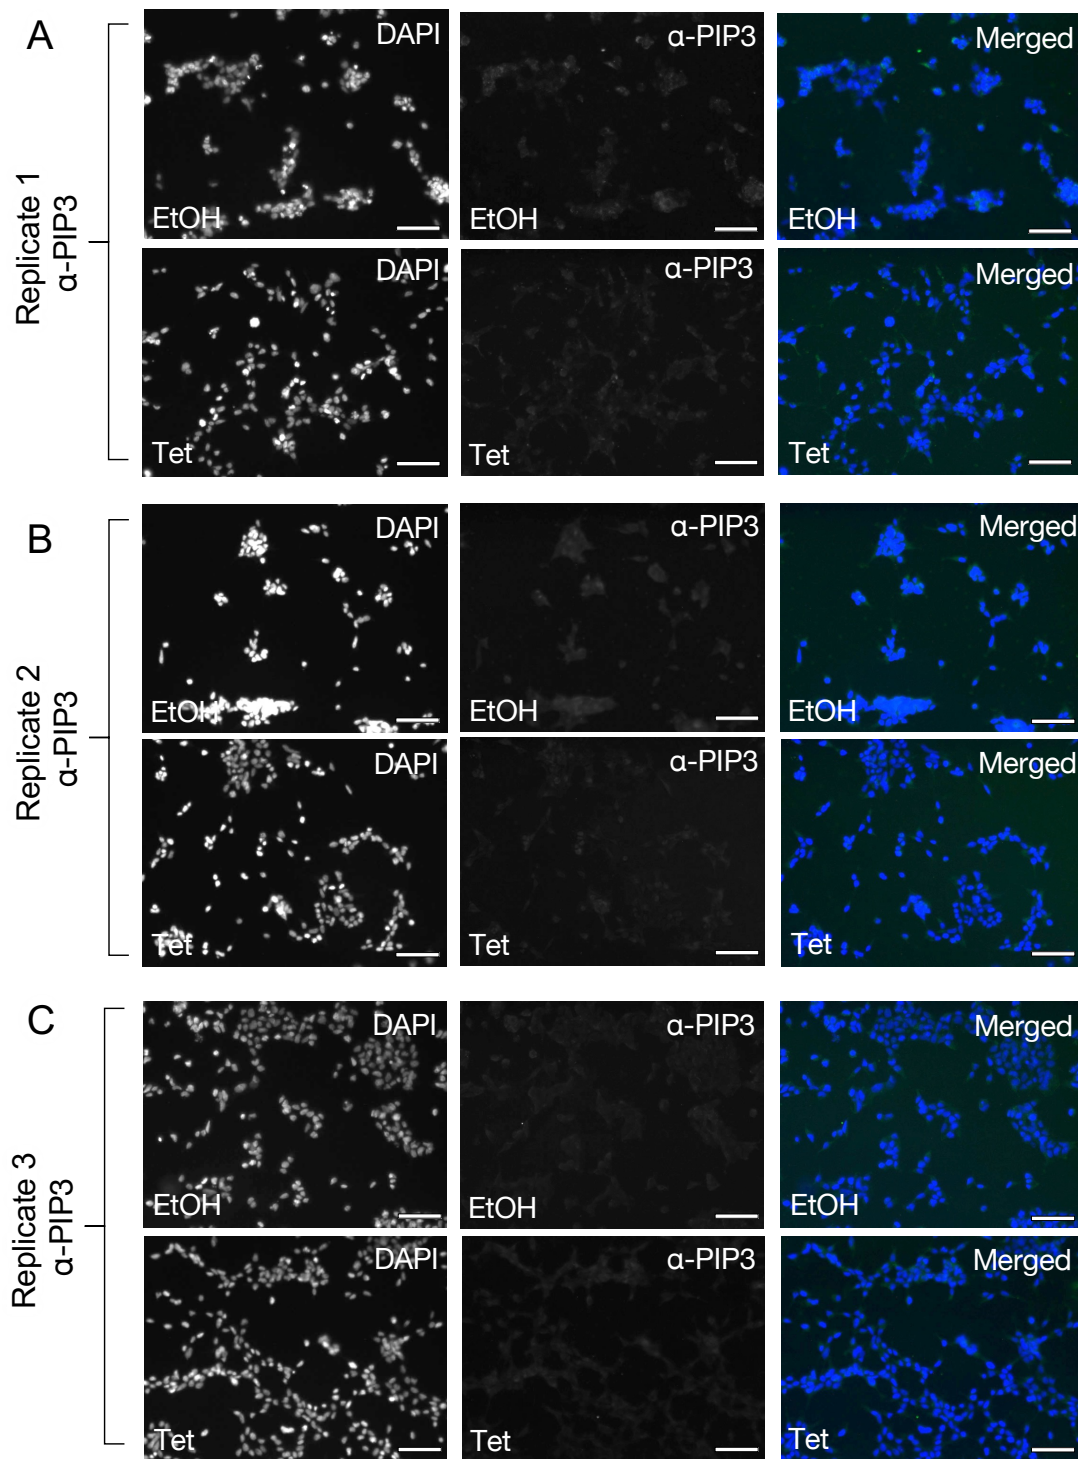

**Supplemental Figure S3.** Triplicates of independent chambers of wild-type SF-1 HEK cells stained with PIP3 antibodies. HEK cells bearing a stable, tetracycline (Tet) inducible wild type SF-1 were stained for **A.** Replicate 1 **B.** Replicate 2 or **C.** Replicate 3 with DAPI (left, blue) and α-PIP3 (middle, green) and IF images collected. Scale bar represents 125um, images were collected at 40X with identical settings. All images had brightness increased by 50%, DAPI (blue) and anti-PIP3 (green) image color was desaturated in the non-merged images.



Supplemental Figure S4, Chi, et al.

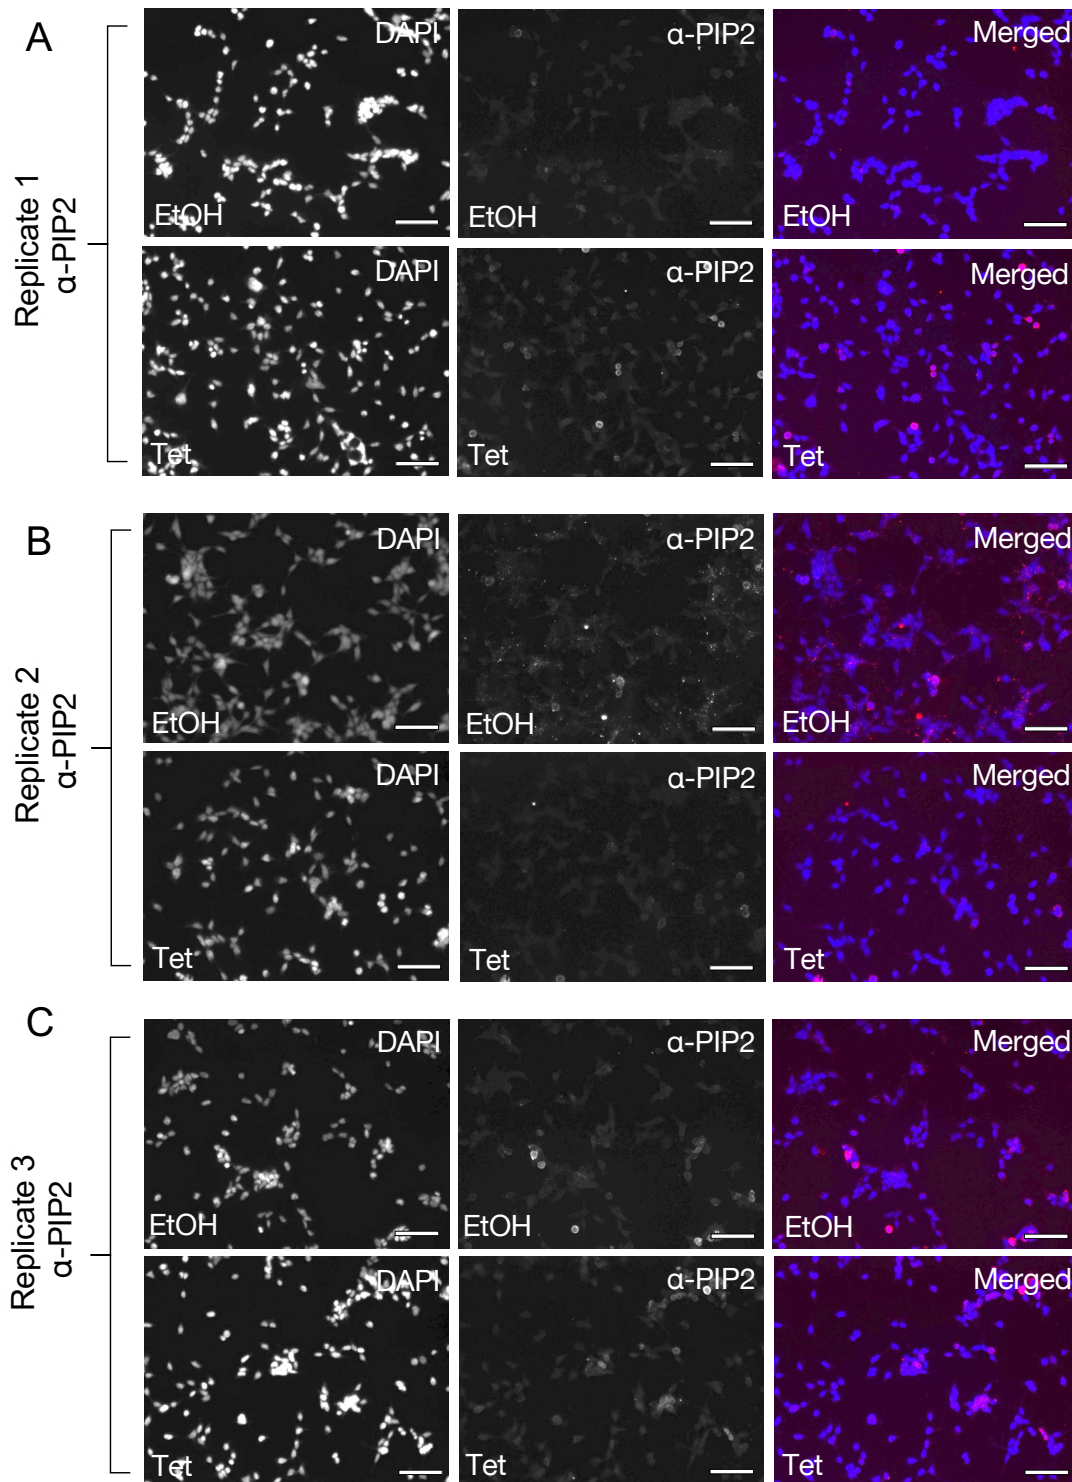

**Supplemental Figure S4.** Triplicate images of independent chambers of *pocket mutant SF-1* (A270W, L345F) HEK cells stained with PIP2 antibodies. HEK cells bearing a stable, tetracycline (Tet) inducible pocket mutant SF-1 (A270W, L345F) stained for **A**. Replicate 1 **B**. Replicate 2 or **C**. Replicate 3 with DAPI (left) and  $\alpha$ -PIP2 (middle) and IF images collected. Scale bar represents 125 $\mu$ m, images were collected at 40X with identical settings. All images had brightness increased identically by 70% so that low levels of PIP2 antibody staining could be visualized, DAPI (blue) and anti-PIP2 (red) image color was desaturated in the non-merged images.

Supplemental Figure S5, Chi, et al.

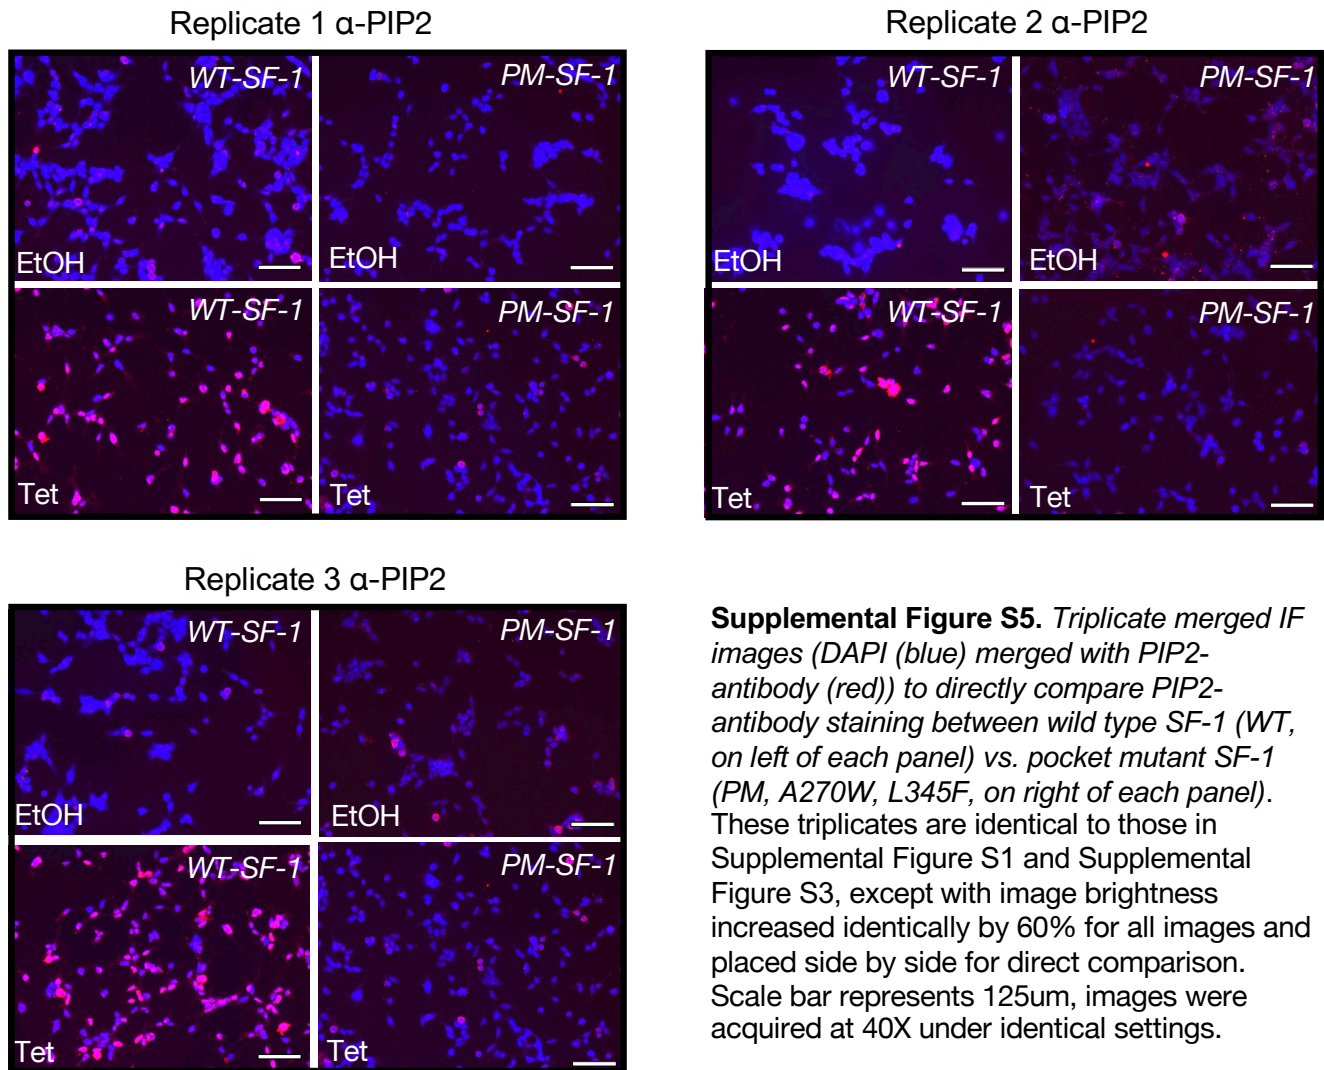

Supplement: s1 [file s1]
